# Supplementary material for: Scytosiphon lomentaria Extract Ameliorates Obesity and Modulates Gut Microbiota in High-Fat-Diet-Fed Mice
Source: MDPI journal article supplement (doi:10.3390/nu15040815), 2023-02-05
Supplement: s1 [file s1]

**Supplemental Table S1. Sequences of primers used for PCR.**

| Gene           | Forward              | Reverse               |
|----------------|----------------------|-----------------------|
| <i>β-actin</i> | CCCTACAGTGCTGTGGGTTT | GAGACATGCAAGGAGTGCAA  |
| <i>Acc1</i>    | GCCTCTTCCTGACAAACGAG | TGACTGCCGAAACATCTCTG  |
| <i>Ampk</i>    | TGTTCCAGCAGATCCTTTCC | ATAATTGGGTGAGCCACAGC  |
| <i>Cebpa</i>   | ATCAGCGCCTACATTGATCC | TTGCTTGGCTGTCGTAGATG  |
| <i>Fas</i>     | CCCTTGATGAAGAGGGATCA | ACTCCACAGGTGGGAACAAG  |
| <i>Pgc1a</i>   | AATGCAGCGGTCTTAGCACT | GTGTGAGGAGGGTTCATCGTT |
| <i>Ppara</i>   | TCTTCACGATGCTGTCTCCT | CTATGTTTAGAAGGCCAGGC  |
| <i>Pparg</i>   | CCCTGGCAAAGCATTGTAT  | GAAACTGGCACCCTTGAAAA  |
| <i>Prdm16</i>  | GGCATGACTTGCTGACTCAA | GGTGTGGACTGGTCTGGTCT  |
| <i>Srebp1</i>  | GAGCCTTCAGACACGTCCTC | ACTCTTCTGGTGTGGCTGCT  |
| <i>Ucp1</i>    | CTGCCAGGACAGTACCCAAG | GCCACAAACCCTTTGAAAAA  |

**Supplemental Table S2. Sequences of primers used for bacterial profiling**

| Target                              | Forward                   | Reverse                   | Reference          |
|-------------------------------------|---------------------------|---------------------------|--------------------|
| Uni (F341/R518)                     | CCTACGGGAGGCAGCAGT        | ATTACCGCGGCTGCTGG         | Lubbs (2009)       |
| Bacteroidetes                       | GGARCATGTGGTTTAATTCGATGAT | AGCTGACGACAACCATGCAG      | Guo (2008)         |
| Firmicutes                          | TGAAACTYAAAGGAATTGACG     | ACCATGCACCACCTGTC         | De Gregoris (2011) |
| <i>Akkermansia muciniphila</i>      | CTGAACCAGCCAAGTAGCG       | CCGCAAACTTTCACAACTGACTTA  | Collado (2007)     |
| <i>Bifidobacterium bifidum</i>      | ATTTGAGCCACTGTCTGGTG      | CATCCGGGAACGTCGGGA AA     | Sul (2007)         |
| <i>Bifidobacterium breve</i>        | AATGCCGGATGCTCCATCACAC    | GCCTTGCTCCCTAACAAAAGAGG   | Rinne (2005)       |
| <i>Bifidobacterium longum</i>       | GGATGTTCCAGTTGATCGCATGGTC | AGCCGGTGCTTATTCAACGGGTAA  | Bergstrom (2012)   |
| <i>Bacteroides vulgatus</i>         | GCATCATGAGTCCGCATGTTT     | TCCATACCCGACTTTATTCCTT    | Wang (1996)        |
| <i>Clostridium butyricum</i>        | GTGCCGCGCTAACGCATTAAGTAT  | ACCATGCACCACCTGTCTTCCTGCC | Bartosch (2004)    |
| <i>Faecalibacterium prausnitzii</i> | AGATGGCCTCGCGTCCGA        | CCGAAGACCTTCTTCCTCC       | Wang (1996)        |
| <i>Lactobacillus plantarum</i>      | AATTGAGGCAGCTGGCCA        | GATTACGGGAGTCCAAGC        | Quere, 1997        |
| <i>Lactobacillus reuteri</i>        | GCCGCCTAAGGTGGGACAGAT     | AACACTCAAGGATTGTCTGA      | Walter (2000)      |
| <i>Lactococcus lactis</i>           | TGAAGAATTGATGGAACCTCG     | CATTGTGGTTCACCGTTC        | Bachmann (2015)    |
